# Supplementary material for: Maternal high-fat diet regulates glucose metabolism and pancreatic β cell phenotype in mouse offspring at weaning
Source: PeerJ. 2020 Jun 22;8:e9407. doi: 10.7717/peerj.9407 (PMC7316079; doi:10.7717/peerj.9407)
Supplement: Supplemental Information 1 [file peerj-08-9407-s001.xlsx]

## Sheet: Sheet1
Body weight of offspring			FBG of offspring			Insulin of offspring
Chow	HFD		Chow	HFD		Chow	HFD
12.3	12.5		242.5	352.5		0.432	2.008
13.2	14.1		223	298.75		0.616	0.93
10.8	12.9		260.667	358		0.776	0.601
12.6	13.1		184	332		0.525	2.61
12.6	14		233.5	309		0.614	0.625
13.5	14.4		259.5	305		0.537
	13.7			317.5		0.57
						0.672
IPGTT of offspring
	Chow							HFD
0	135	127	165	164	186	217.5		254	172	144.5	247.5	238	191.5	136
15	344.5	294.5	359.5	334.5	302	393.5		486.333	441.667	539	463	443	441	396
30	279	265.5	284.5	256.5	255.5	271.5		388.667	384	498	252	350.5	489	359
60	261.5	223	222	244	235.5	246.5		283.667	292	338	211	207	353.5	294
120	171	170.5	142.5	158	193	215		164.333	161.667	198.5	202.5	170	211.5	160.5
IPGTT AUC of offspring
Chow	HFD
489.25	594
441.562	575.75
454.938	692.312
462.312	500.688
467.688	512.188
519.75	688.438
	551.375
IPITT of offspring
	Chow							HFD
0	242.5	223	260.667	184	233.5	259.5		352.5	298.75	358	332	309	305	317.5
5	261	237	252	188	286	272.5		400.25	321.75	323.5	333	358	309	319
10	225	195	242	183	206.5	193.5		368.25	325.75	321.5	259	312	275	282.5
15	159.5	143	203.333	161.5	159.5	151		332.5	259.75	287.5	177	221.5	189	238
30	140.5	105.333	178.667	121.5	130	140		206.5	210	245	136	148.5	126	158
45	120	121	183	141	113	138.5		162.5	214	239.5	142	142	122	167.5
60	127.5	122.333	181.333	162.5	119	135		180.25	213	221.5	135	174	112	172.5
IPITT AUC of offspring
Chow	HFD
158.25	248.927
141	242.323
199	265.396
151.438	179.042
152.979	200
161.312	168.875
	205.958
